# New Titles on Integrated Care

Just Published!

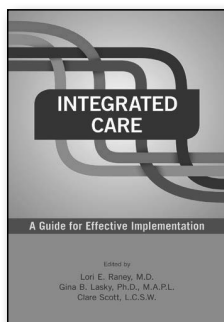

## *Integrated Care*

*A Guide for Effective Implementation*

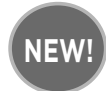

Edited by **Lori E. Raney, M.D., Gina B. Lasky, Ph.D., M.A.P.L., and Clare Scott, L.C.S.W.**

This book provides a detailed, thoughtful, and experience-based guide to the complex and potentially overwhelming process of implementing an integrated care program. The advantages of integrated care from both the clinical and administrative perspectives are many, including better detection of illness, improvement in overall health outcomes, a better

patient care experience, and flexibility in responding to policy and financial changes. The book addresses the emerging framework of core principles for effective integrated care, reviews the most up-to-date research on implementation, and presents practice-based experience to serve as a guide. This information is useful in both traditional integration of behavioral health into general medical settings or integrating general medical care into a specialty mental health or substance use treatment setting. Because administrators, clinicians, policy makers, payers and others need guidance in determining what effective implementation looks like, the authors offer a three-part examination of the key components of an implementation strategy and explore the elements essential for success.

2017 • 290 pages • ISBN 978-1-61537-054-2 • Paperback • \$59.00 • Item #37054

2017 • 290 pages • ISBN 978-1-61537-133-4 • eBook • \$47.00 • Item #37133

## *Study Guide to Preventive Medical Care in Psychiatry*

*A Case Approach*

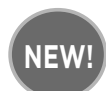

Edited by **Robert M. McCarron, D.O., Glen L. Xiong, M.D., Craig R. Keenan, M.D., Lorin M. Scher, M.D., Jaesu Han, M.D., and Mark E. Servis, M.D.**

*Study Guide to Preventive Medical Care in Psychiatry: A Case Approach* is an indispensable companion to *Preventive Medical Care in Psychiatry: A Practical Guide for Clinicians*. Like the primary text, the study guide was written by experts in the field and it reflects the text's focus on clinical care for psychiatrists and other mental health care providers who work in outpatient mental health and integrated clinics. Through the deft use of clinical cases, the study guide helps providers and trainees acquire the knowledge and skills necessary to view the patient holistically and improve outcomes.

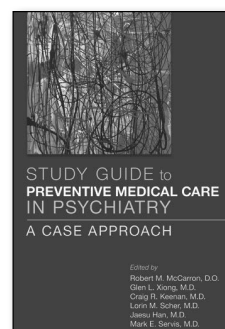

2017 • 313 pages • ISBN 978-1-61537-057-3 • Paperback • \$59.00 • Item #37057

2017 • 313 pages • ISBN 978-1-61537-116-7 • eBook • \$47.00 • Item #37116

Order Now

[www.appi.org](http://www.appi.org)

20% Discount for American Psychiatric Association Members  
25% Discount for APA Resident-Fellow Members

Please use Priority Code AH1737 when ordering.

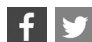

AMERICAN  
PSYCHIATRIC  
ASSOCIATION  
PUBLISHING

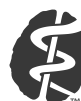

[www.appi.org](http://www.appi.org)

Email: [appi@psych.org](mailto:appi@psych.org)

Toll Free: 1-800-368-5777

# The DSM-5 Collection

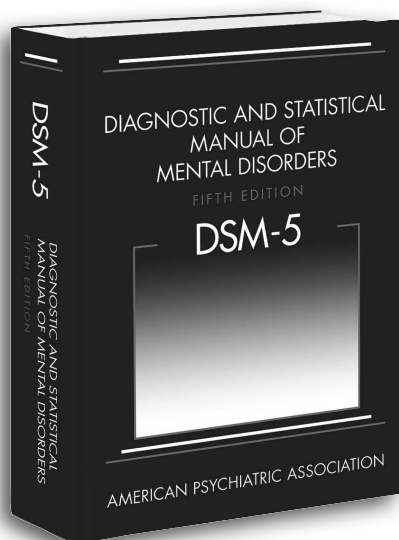

## Diagnostic and Statistical Manual of Mental Disorders, Fifth Edition (DSM-5®)

American Psychiatric Association

This new edition of *Diagnostic and Statistical Manual of Mental Disorders (DSM-5®)*, used by clinicians and researchers to diagnose and classify mental disorders, is the product of more than 10 years of effort by hundreds of international experts in all aspects of mental health. Their dedication and hard work have yielded an authoritative volume that defines and classifies mental disorders in order to improve diagnosis, treatment, and research.

The criteria are concise and explicit, intended to facilitate an objective assessment of symptom presentations in a variety of clinical settings—inpatient, outpatient, partial hospital, consultation-liaison, clinical, private practice, and primary care.

- The latest findings in neuroimaging and genetics have been integrated into each disorder along with gender and cultural considerations.
- The revised organizational structure recognizes symptoms that span multiple diagnostic categories, providing new clinical insights in diagnosis.

Includes ICD-10-CM codes

- Both ICD-9-CM and ICD-10-CM codes are included for each disorder.

The *Diagnostic and Statistical Manual of Mental Disorders, Fifth Edition*, is the most comprehensive, current, and critical resource for clinical practice available to today's mental health professionals.

2013 • 991 pages • ISBN 978-0-89042-554-1 • Hardcover • \$210.00 • Item #2554

2013 • 991 pages • ISBN 978-0-89042-555-8 • Paperback • \$160.00 • Item #2555

2013 • 991 pages • ISBN 978-0-89042-557-2 • eBook • \$128.00 • Item #2557

**DSM-5**  
COLLECTION

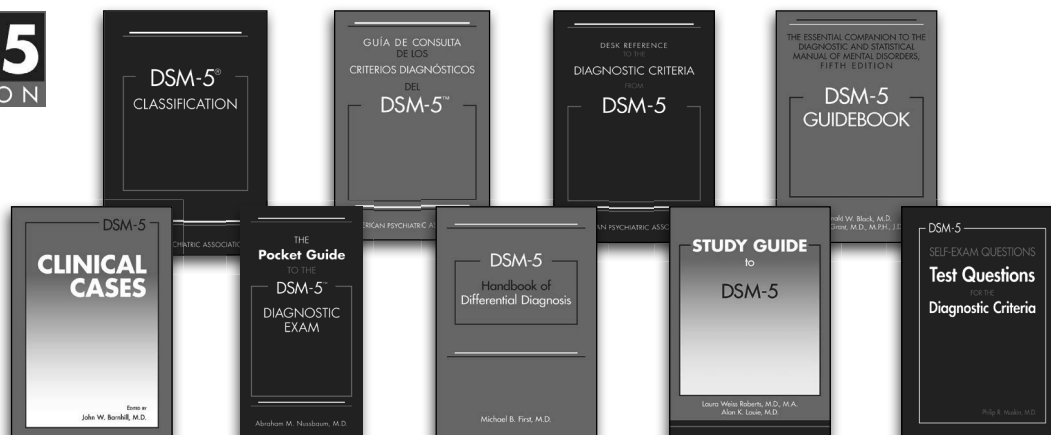

AMERICAN  
PSYCHIATRIC  
ASSOCIATION  
PUBLISHING

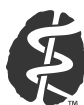

Order Online: [www.appi.org](http://www.appi.org)  
Phone: 703-907-7322  
Toll Free: 1-800-368-5777  
Email: [appi@psych.org](mailto:appi@psych.org)

20% Discount for American Psychiatric  
Association Members

25% Discount for APA Resident-Fellow Members AH1706A

## Competency in Combining Pharmacotherapy and Psychotherapy Integrated and Split Treatment, Second Edition

### Core Competencies in Psychotherapy

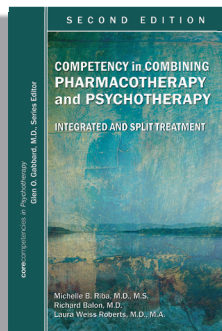

Michelle B. Riba, M.D., M.S.,  
Richard Balon, M.D., and  
Laura Weiss Roberts, M.D., M.A.

Series Editor: Glen O. Gabbard, M.D.

This book is designed to help psychiatrists at any stage of their career achieve competency in combining and coordinating pharmacotherapeutic and psychotherapeutic treatments for the benefit of their patients.

2018 • 175 pages • ISBN 978-1-61537-066-5 • Paperback • \$65.00 • Item #37066

2018 • 175 pages • ISBN 978-1-61537-180-8 • eBook • \$52.00 • Item #37180

AMERICAN  
PSYCHIATRIC  
ASSOCIATION  
PUBLISHING

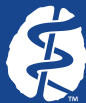

Order @ [www.appi.org](http://www.appi.org)  
Email: [appi@psych.org](mailto:appi@psych.org)  
Phone: 1-800-368-5777

AH1805A

# Our Work Matters

Hope. Recovery. Wellbeing.

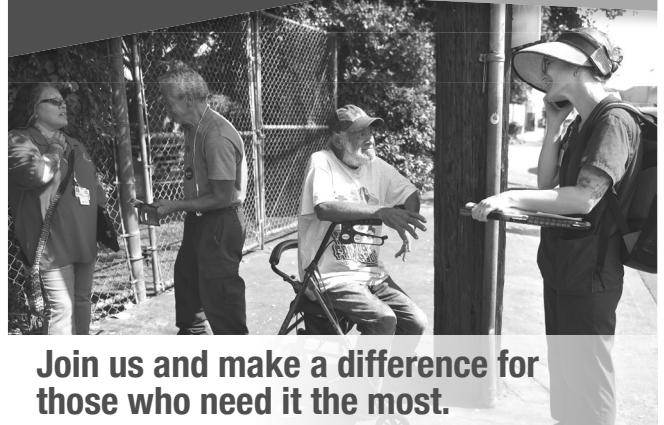

## Join us and make a difference for those who need it the most.

Los Angeles County Department of Mental Health is a nationally recognized leader providing a wide range of services to one of the largest populations in the country. We invite you to join our team as we help the most vulnerable in our community find a path to independence and personal recovery.

Starting annual salary immediately post residency completion is **\$233,784** with **potential bonuses of \$32,000 annually**. Student **loan repayment** and recruitment incentives available.

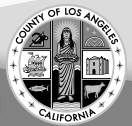

[www.psychiatristjobs.la](http://www.psychiatristjobs.la)

Visit [ps.psychiatryonline.org](http://ps.psychiatryonline.org) for these features!

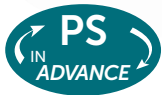

New content is available in advance of print every 2 weeks!

### Low-Burden Strategies to Promote Smoking Cessation Treatment Among Patients With Serious Mental Illness

### Addressing the Social Determinants of Mental Health: If Not Now, When? If Not Us, Who?

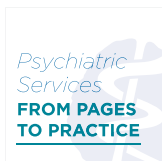

Listen to our podcast, *Psychiatric Services From Pages to Practice*, and learn about the latest mental health services research and why it is relevant.

**Episode 11** discusses the In SHAPE lifestyle intervention for people with serious mental illness, a peer intervention for persons with recurrent psychiatric hospitalizations, and work requirements for Medicaid.

Sign up (<http://appi.org/etocs>) to receive alerts as soon as new content is available.

AMERICAN  
PSYCHIATRIC  
ASSOCIATION  
PUBLISHING

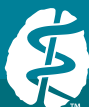

[ps.psychiatryonline.org](http://ps.psychiatryonline.org)

[www.appi.org](http://www.appi.org) • 1-800-368-5777 • e-mail: [appi@psych.org](mailto:appi@psych.org)

Keep up with the latest from *Psychiatric Services* on Facebook ([facebook.com/PsychiatryOnline](https://facebook.com/PsychiatryOnline)) and Twitter (@APAPubPsychSvcs).



Searching for the perfect psychiatric career?

**Let APA JobCentral help!**

### Manage Your Career

- Browse hundreds of active job listings!
- Create an account to save jobs, store multiple resumes and cover letters and communicate with employers through our internal messaging system.
- Set up multiple job alerts specifying your skills, interests and location to receive e-mails when employers post jobs that match your criteria.

### Recruit for Open Positions

- Post your job in front of thousands of highly qualified psychiatrists.
- Cross promote your job listing in Psychiatric News.
- Search the anonymous resume database to find your ideal candidate.

AMERICAN  
**PSYCHIATRIC**  
ASSOCIATION

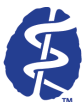

**JOBCENTRAL**  
The Career Hub for Psychiatry

**jobs.psychiatry.org**
